# Supplementary material for: Thermoplastic starch–polyethylene blends homogenised using deep eutectic solvents
Source: Royal Society of Chemistry journal article supplement (doi:10.1039/c7ra00135e), 2017-01-01
Supplement: c7ra00135e1.pdf [file c7ra00135e1.pdf]

## Thermoplastic Starch-Polyethylene Blends Homogenised using Deep Eutectic Solvents

Andrew P. Abbott,<sup>1\*</sup> Tariq Z. Abolibda,<sup>1</sup> Wanwan Qu,<sup>1</sup> William R. Wise<sup>2</sup> and Luka A. Wright<sup>1</sup>

<sup>1</sup>Department of Chemistry, University of Leicester, University Road, Leicester, LE1 7RH, UK

Email: apa1@le.ac.uk

<sup>2</sup>Institute for Creative Leather Technologies, University of Northampton, Northampton, NN2 7AL, UK

### Supplementary Information

#### DSC curves for Tables 1 and 2

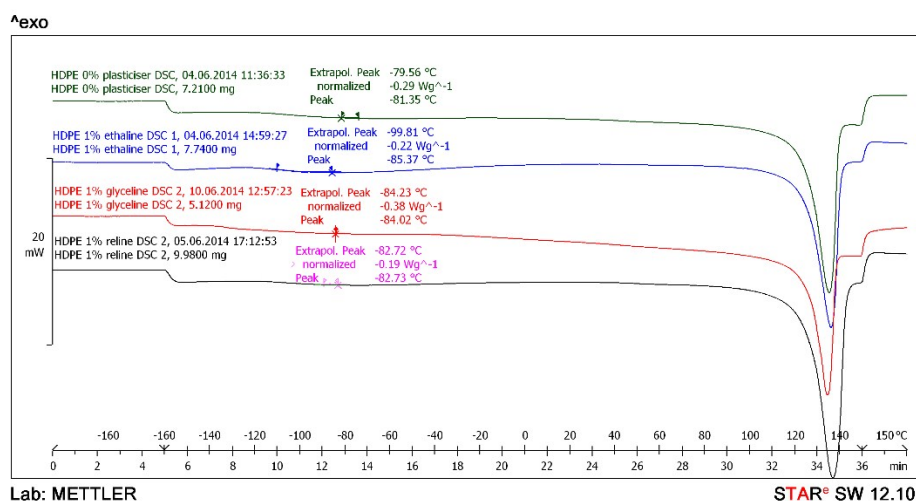

Figure S1: A comparison of the glass transition temperature of the blank samples and HDPE plasticised by 1 % of all three DES (from top to bottom, Ethaline, Glyceline, Reline) using DSC

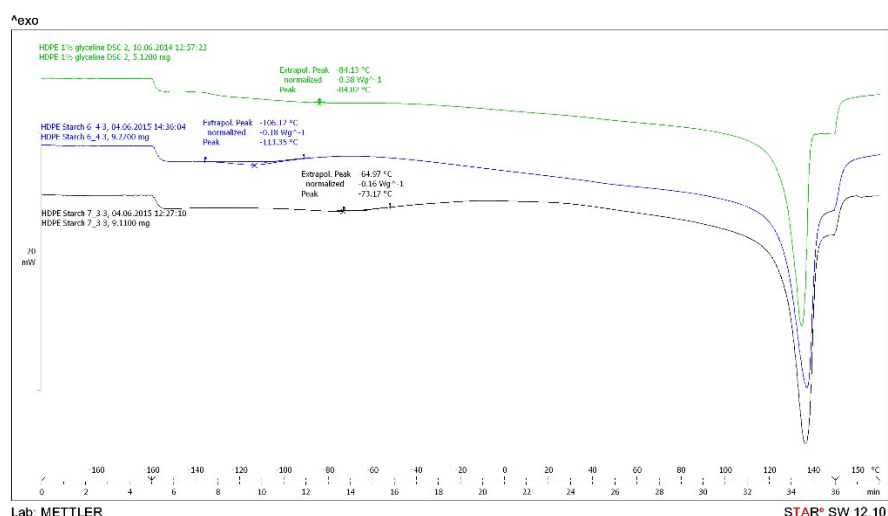

Figure S2: A comparison of the glass transition temperature obtained using DSC of the HDPE plasticised by 1 % Glyceline compared with two HDPE/Starch mixtures plasticised with Glyceline.
